# Supplementary material for: Consensus clustering and novel risk score model construction based on m6A methylation regulators to evaluate the prognosis and tumor immune microenvironment of early-stage lung adenocarcinoma
Source: publisher site journal article supplement (doi:10.18632/aging.206004), 2024-07-05
Supplement: Supplementary file [file aging-v16-206004-supplementary-material-SD1.pdf]

SUPPLEMENTARY FIGURES

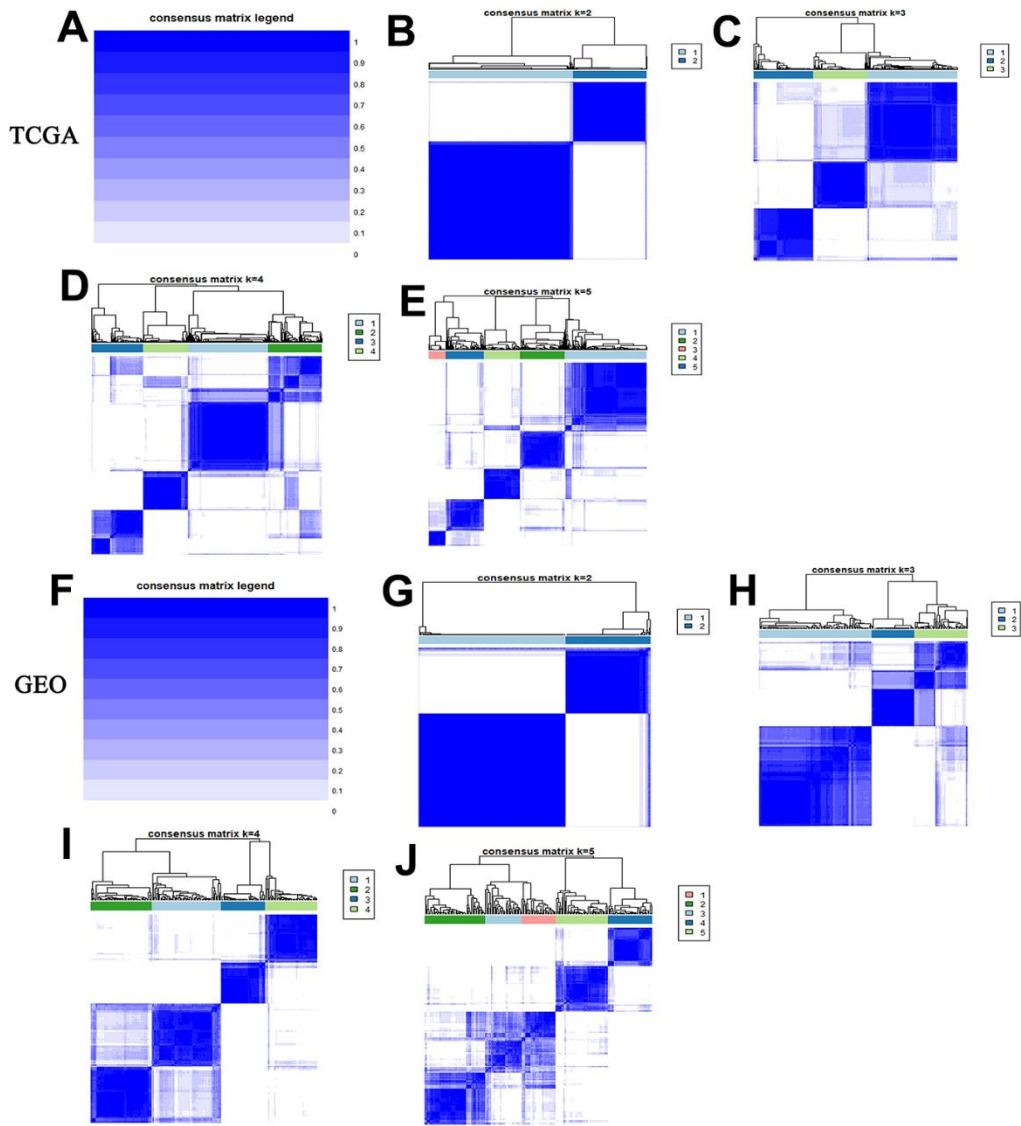

**Supplementary Figure 1. Consensus clustering matrix analysis based on m<sup>6</sup>A methylation regulators.** (A) Color legend of consensus clustering matrix heat map in TCGA. The values of the consistency matrix from 0 (impossible to cluster together) to 1 (always cluster together) were represented by white to dark blue. (B) Consistent clustering matrix for k = 2 in TCGA. (C) Consistent clustering matrix for k = 3 in TCGA. (D) Consistent clustering matrix for k = 4 in TCGA. (E) Consistent clustering matrix for k = 5 in TCGA. (F) Color legend of consensus clustering matrix heat map in GEO. The values of the consistency matrix from 0 (impossible to cluster together) to 1 (always cluster together) were represented by white to dark blue. (G) Consistent clustering matrix for k = 2 in GEO. (H) Consistent clustering matrix for k = 3 in GEO. (I) Consistent clustering matrix for k = 4 in GEO. (J) Consistent clustering matrix for k = 5 in GEO. When taking different k values, the clustering effect was obviously different. The cleaner the clustering matrix, the better the effect.

|         |  |            |
|---------|--|------------|
| HNRNPC  |  | DABIGATRAN |
| IGF2BP1 |  | Not found  |
| IGF2BP3 |  | Not found  |
| Gene    |  | Drug       |

Supplementary Figure 2. Prediction of HNRNPC, IGF2BP1 and IGF2BP3 related drugs based on DGIdb database.

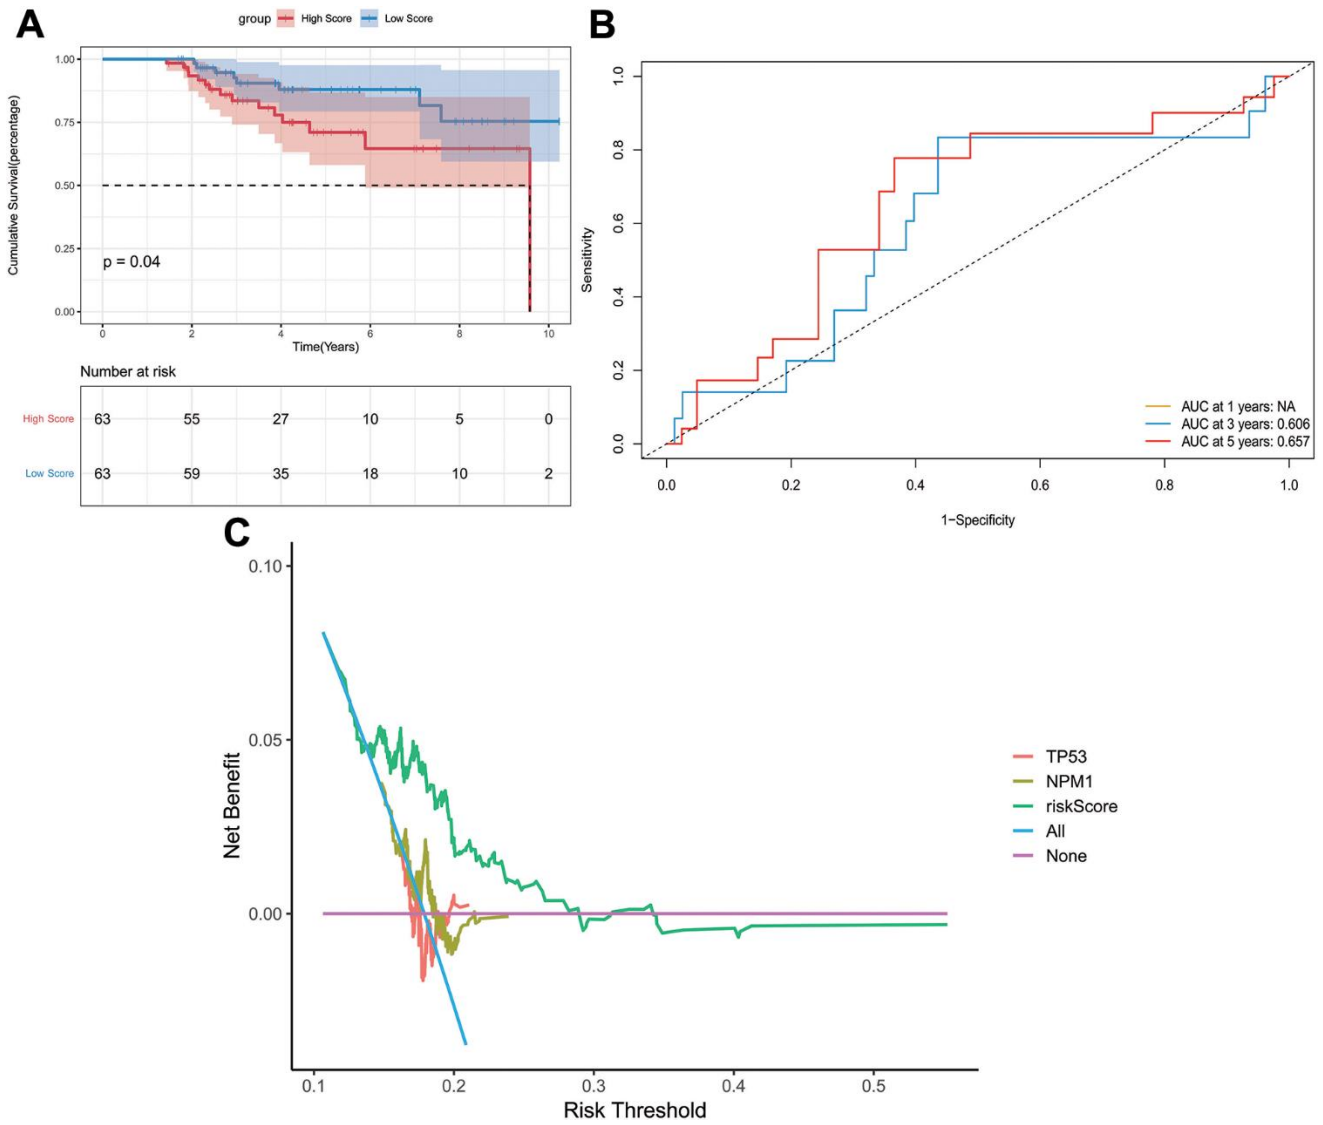

**Supplementary Figure 3. Kaplan-Meier survival and time-dependent ROC analyses based on cBioPortal, and DCA based on TCGA. (A)** Kaplan-Meier survival analysis of early-stage LUAD in cBioPortal high and low risk score group; **(B)** Time-dependent ROC analysis measure the predictive value of the risk score in cBioPortal; **(C)** Prognostic indicator genes TP53 and NPM1 for LUAD and risk score were selected to perform DCA based on TCGA.

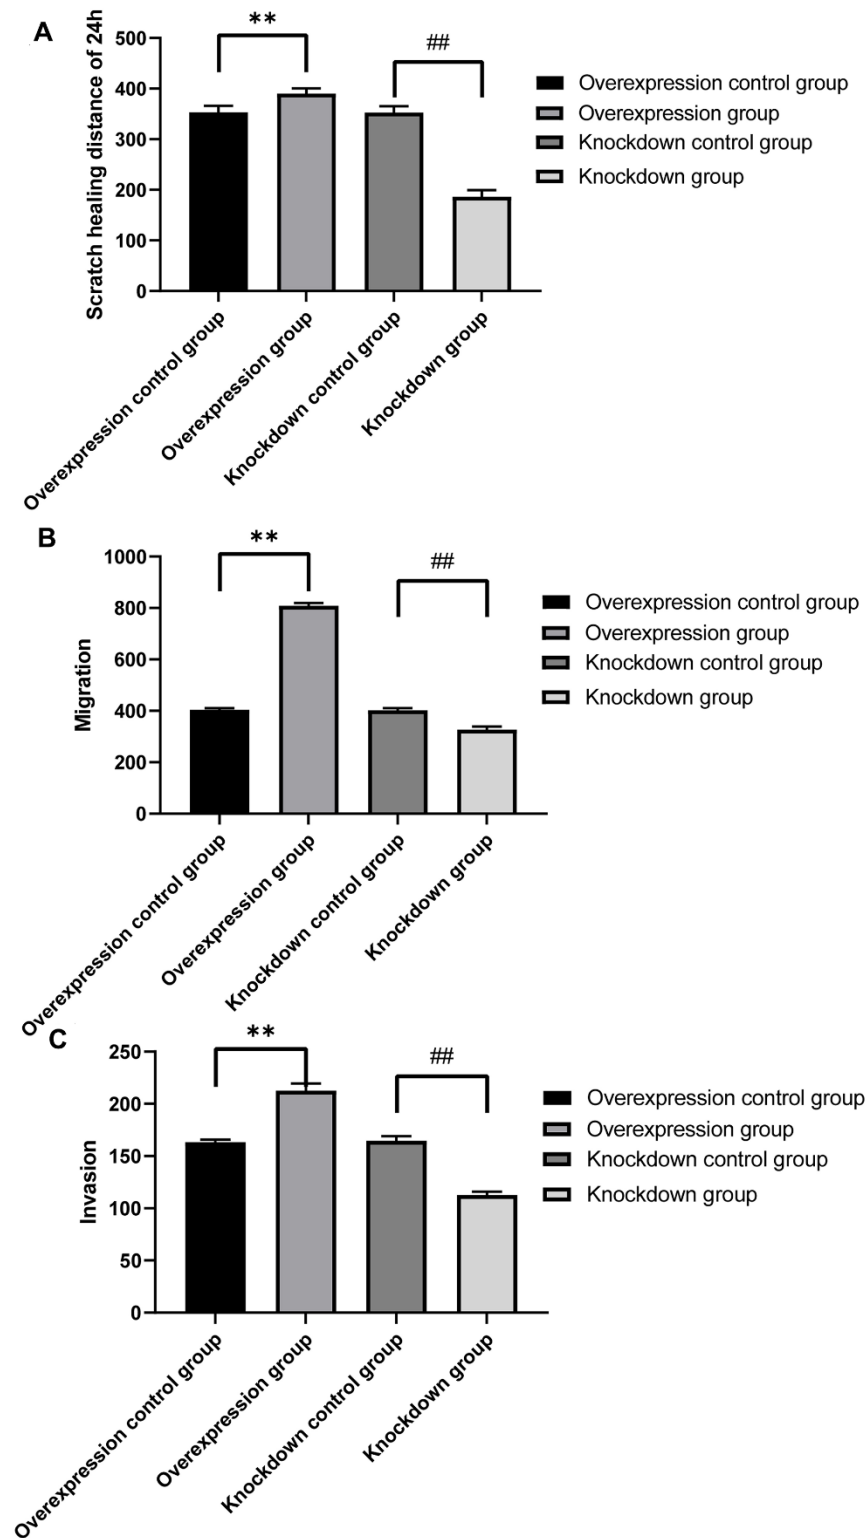

**Supplementary Figure 4. One-way ANOVA was used to analyze the effect of HNRNPC on the migration and invasion of NCI-H1299 cells by SPSS17.0 software. (A) Statistical analysis of 24 h scratch healing distance of NCI-H1299 cells after HNRNPC overexpression and knockdown; (B) Statistical analysis of NCI-H1299 cells migration after HNRNPC overexpression and knockdown; (C) Statistical analysis of NCI-H1299 cells invasion after HNRNPC overexpression and knockdown. \*\*P<0.01; ##P<0.01.**
