# Supplementary material for: Consensus clustering and novel risk score model construction based on m6A methylation regulators to evaluate the prognosis and tumor immune microenvironment of early-stage lung adenocarcinoma
Source: publisher site journal article supplement (doi:10.18632/aging.206004), 2024-07-05
Supplement: Supplementary file [file aging-v16i14-206004-supplementary-material-SD2.pdf]

## SUPPLEMENTARY TABLES

**Supplementary Table 1. Basic information of datasets.**

| Accession number /Source | Platform                                    | Number of patients     | Survival data    |
|--------------------------|---------------------------------------------|------------------------|------------------|
| GEO: GSE31210            | Affymetrix Human Genome U133 Plus 2.0 Array | Control: LUAD= 20:226  | Overall Survival |
| TCGA: early-stage LUAD   | Illumina RNAseq                             | Control: LUAD = 59:398 | Overall Survival |

GEO, Gene Expression Omnibus; TCGA, The Cancer Genome Atlas; LUAD, Lung adenocarcinoma.

**Supplementary Table 2. Clinical information of patients in the RT-PCR.**

| Number | Sex    | Age | Cancer metastasis | Pathological grade (stage I, II, III, IV) | Clinical stages (T stage, N stage, M stage) |    |    | Smoking history | Radiotherapy, chemotherapy and other treatment history | History of other malignancies | Family history of cancer |
|--------|--------|-----|-------------------|-------------------------------------------|---------------------------------------------|----|----|-----------------|--------------------------------------------------------|-------------------------------|--------------------------|
| 1      | Female | 50  | No                | IB                                        | T2                                          | N0 | M0 | No              | No                                                     | No                            | No                       |
| 2      | Female | 53  | No                | IA1                                       | T1a                                         | N0 | M0 | No              | No                                                     | No                            | No                       |
| 3      | Male   | 43  | No                | IA1                                       | T1a                                         | N0 | M0 | Yes             | No                                                     | No                            | No                       |
| 4      | Male   | 59  | No                | IA2                                       | T1b                                         | N0 | M0 | Yes             | No                                                     | No                            | No                       |
| 5      | Male   | 57  | No                | IA1                                       | T1a                                         | N0 | M0 | Yes             | No                                                     | No                            | No                       |
| 6      | Female | 54  | No                | IA1                                       | T1a                                         | N0 | M0 | No              | No                                                     | No                            | No                       |
| 7      | Female | 47  | No                | IA1                                       | T1a                                         | N0 | M0 | No              | No                                                     | No                            | No                       |
| 8      | Female | 49  | No                | IB                                        | T2a                                         | N0 | N0 | No              | No                                                     | No                            | No                       |
| 9      | Female | 55  | No                | IA1                                       | T1a                                         | N0 | N0 | No              | No                                                     | No                            | No                       |
| 10     | Male   | 66  | No                | IA2                                       | T1b                                         | N0 | N0 | No              | No                                                     | No                            | No                       |
| 11     | Female | 66  | No                | IA1                                       | T1b                                         | N0 | N0 | No              | No                                                     | No                            | No                       |
| 12     | Female | 52  | No                | IB                                        | T2a                                         | N0 | N0 | No              | No                                                     | No                            | No                       |
| 13     | Male   | 52  | No                | IA2                                       | T1b                                         | N0 | N0 | Yes             | No                                                     | No                            | No                       |

**Supplementary Table 3. Primer sequence in the RT-PCR.**

| Primer name                 | Primer sequence (5' to 3')  |
|-----------------------------|-----------------------------|
| ACTB-F (internal reference) | 5-CATGTACGTTGCTATCCAGGC-3   |
| ACTB-R (internal reference) | 5-CTCCTTAATGTCACGCACGAT-3   |
| HNRNPC-F                    | 5-GTTACCAACAAGACAGATCCTCG-3 |
| HNRNPC-R                    | 5-AGGCAAAGCCCTTATGAACAG-3   |
| IGF2BP1-F                   | 5-TGCAGTTTGGGTTGTGGACT-3    |
| IGF2BP1-R                   | 5-GATAGCTCCCAACTGCCTCC-3    |
| IGF2BP3-F                   | 5-CATCGAGGCGCTTTCAGGTA-3    |
| IGF2BP3-R                   | 5-CTCACAGCTCTCCACCACTC-3    |
